# Supplementary material for: Molecular heterogeneity of anti-PD-1/PD-L1 immunotherapy efficacy is correlated with tumor immune microenvironment in East Asian patients with non-small cell lung cancer
Source: PubMed Central journal article supplement (PMC7476088; doi:10.20892/j.issn.2095-3941.2020.0121), 2020-08-15
Supplement: cbm-17-768-s001.pdf [file cbm-17-768-s001.pdf]

## Supplementary materials

**Table S1** Demographic characteristics and their correlations with clinical outcomes in a cohort of 207 advanced NSCLC patients treated with anti-PD-1/PD-L1 monotherapy

| Characteristics                 | Whole population | Wild type | EGFR mutation | KRAS mutation | ALK fusion | <i>P</i> |
|---------------------------------|------------------|-----------|---------------|---------------|------------|----------|
| Case no.                        | 207              | 111       | 20            | 74            | 2          |          |
| Gender, n (%)                   |                  |           |               |               |            | 0.294    |
| Male                            | 101 (48.8)       | 61 (55.0) | 8 (40.0)      | 31 (41.9)     | 1 (50.0)   |          |
| Female                          | 106 (51.2)       | 50 (45.0) | 12 (60.0)     | 43 (58.1)     | 1 (50.0)   |          |
| Age, n (%)                      |                  |           |               |               |            | 0.368    |
| <60                             | 63 (30.4)        | 34 (30.6) | 9 (45.0)      | 19 (25.6)     | 1 (50.0)   |          |
| ≥ 60                            | 144 (69.6)       | 77 (69.4) | 11 (55.0)     | 55 (74.3)     | 1 (50.0)   |          |
| Smoking status, n (%)           |                  |           |               |               |            | <0.001   |
| Never                           | 38 (18.4)        | 24 (21.6) | 9 (45.0)      | 4 (5.4)       | 1 (50.0)   |          |
| Ever                            | 169 (81.6)       | 87 (78.4) | 11 (55.0)     | 70 (94.6)     | 1 (50.0)   |          |
| Therapy line, n (%)             |                  |           |               |               |            | 0.545    |
| 1st line                        | 33 (15.9)        | 16 (14.4) | 2 (10.0)      | 15 (20.3)     | 0 (0)      |          |
| ≥ 2nd line                      | 174 (84.1)       | 95 (85.6) | 18 (90.0)     | 59 (79.7)     | 2 (100.0)  |          |
| Objective response, n (%)       |                  |           |               |               |            | 0.453    |
| PR                              | 39 (18.9)        | 20 (18.0) | 2 (10.0)      | 17 (23.0)     | 0 (0)      |          |
| SD                              | 67 (39.3)        | 40 (36.0) | 4 (20.0)      | 22 (29.7)     | 1 (50.0)   |          |
| PD                              | 101 (48.8)       | 51 (46.0) | 14 (70.0)     | 35 (47.3)     | 1 (50.0)   |          |
| Durable clinical benefit, n (%) |                  |           |               |               |            | 0.059    |
| YES                             | 53 (25.6)        | 29 (26.1) | 2 (10.0)      | 22 (29.7)     | 0 (0)      |          |
| NO                              | 143 (69.1)       | 77 (69.4) | 16 (80.0)     | 49 (66.2)     | 1 (50.0)   |          |
| Unknown                         | 11 (5.3)         | 5 (4.5)   | 2 (10.0)      | 3 (4.1)       | 1 (50.0)   |          |

**Table S2** Basic characteristics of studies focused on the correlation between PD-L1 expression and classic driver gene status in NSCLC patients

| Study ID               | Region | Number of patients |          |          |            | Histology | Stage    | Method (Ab)               | Definition of PD-L1 <sup>+</sup> | Number of PD-L1 <sup>+</sup> patients |          |          |            |
|------------------------|--------|--------------------|----------|----------|------------|-----------|----------|---------------------------|----------------------------------|---------------------------------------|----------|----------|------------|
|                        |        | Wild type          | EGFR mut | KRAS mut | ALK fusion |           |          |                           |                                  | Wild type                             | EGFR mut | KRAS mut | ALK fusion |
| Cha et al. (2016)      | Korea  | 106                | 157      | 32       | –          | Mix       | I-IV     | IHC (clone SP142)         | ≥ 5%                             | 27                                    | 21       | 9        | –          |
| Chan et al. (2018)     | China  | 159                | 176      | 46       | 18         | Mix       | I-IV     | IHC (clone 22C3)          | ≥ 50%                            | 22                                    | 11       | 11       | 2          |
| Chen et al. (2017)     | China  | 24                 | 28       | –        | –          | ADC       | I-III    | IHC (17952-1-AP)          | ≥ 5%                             | 8                                     | 16       | –        | –          |
| Cui et al. (2018)      | China  | 96                 | 24       | 6        | –          | Mix       | I-III A  | IHC (clone E1L3N)         | ≥ 5%                             | 36                                    | 2        | 5        | –          |
| Inamura et al. (2016)  | Japan  | 144                | 93       | 21       | 10         | ADC       | I-IV     | IHC (clone E1L3N)         | ≥ 5%                             | 34                                    | 4        | 4        | 1          |
| Inoue et al. (2016)    | Japan  | 512                | 132      | –        | 10         | Mix       | I-III    | IHC (clone E1L3N)         | ≥ 5%                             | 171                                   | 25       | –        | 5          |
| Ji et al. (2016)       | China  | 30                 | 60       | 10       | –          | ADC       | I-III    | IHC (ab174838)            | ≥ 5%                             | 17                                    | 18       | 5        | –          |
| Jia et al. (2018)      | China  | 53                 | 55       | –        | –          | Mix       | NR       | IHC (clone E1L3N)         | ≥ 10%                            | 9                                     | 7        | –        | –          |
| Kim et al. (2018)      | Korea  | 417                | 223      | 23       | 24         | Mix       | I-IV     | IHC (clone 22C3)          | ≥ 1%                             | 44                                    | 22       | 8        | 3          |
| Koh et al. (2015)      | Korea  | 221                | 228      | 25       | 23         | ADC       | I-III    | IHC (clone E1L3N)         | ≥ 5%                             | 131                                   | 128      | 16       | 18         |
| Li et al. (2018)       | China  | 139                | 79       | 23       | –          | Mix       | I-III    | IHC (clone SP263)         | ≥ 50%                            | 23                                    | 5        | 7        | –          |
| Mori et al. (2016)     | Japan  | 180                | 10       | –        | –          | ADC       | I-III    | IHC (clone EPR1611)       | score 50                         | 90                                    | 5        | –        | –          |
| Omori et al. (2018)    | Japan  | 27                 | 20       | –        | –          | Mix       | I-IV     | IHC (clone E1L3N)         | ≥ 1%                             | 17                                    | 6        | –        | –          |
| Shi et al. (2017)      | China  | 20                 | 27       | –        | –          | ASC       | I-IV     | IHC (clone SP263)         | ≥ 25%                            | 7                                     | 10       | –        | –          |
| Song et al. (2016)     | China  | 146                | 205      | 16       | 18         | ADC       | I-III    | IHC (clone 5H1)           | ≥ 5%                             | 59                                    | 112      | 5        | 10         |
| Song et al. (2019)     | China  | 109                | 138      | 39       | 19         | Mix       | I-IV     | IHC (clone 22C3 or SP263) | ≥ 50%                            | 20                                    | 9        | 33       | 1          |
| Takada et al. (2016)   | Japan  | 123                | 112      | –        | –          | ADC       | I-III    | IHC (clone SP142)         | ≥ 5%                             | 32                                    | 8        | –        | –          |
| Tang et al. (2015)     | China  | 66                 | 89       | –        | –          | Mix       | III B-IV | IHC (clone E1L3N)         | ≥ 5%                             | 42                                    | 64       | –        | –          |
| Toyokawa et al. (2016) | Japan  | 108                | 107      | –        | –          | Mix       | I-III    | IHC (clone SP142)         | ≥ 5%                             | 27                                    | 6        | –        | –          |
| Yang et al. (2014)     | China  | 66                 | 97       | –        | –          | ADC       | I        | IHC (17952-1-AP)          | ≥ 5%                             | 22                                    | 43       | –        | –          |
| Yang et al. (2016)     | China  | 87                 | 18       | –        | –          | SCC       | I        | IHC (17952-1-AP)          | ≥ 5%                             | 50                                    | 9        | –        | –          |
| Yang et al. (2018)     | China  | 89                 | 73       | 16       | –          | Mix       | I-IV     | IHC (clone E1L3N)         | ≥ 5%                             | 42                                    | 19       | 10       | –          |
| Zhang et al. (2014)    | China  | 51                 | 76       | 7        | 9          | ADC       | I-III    | IHC (SAB2900365)          | ≥ 40% and staining ≥ 2           | 26                                    | 37       | 4        | 3          |

**Table S3** Main characteristics of included studies in pool analysis performed to investigate PD-L1 expression according to mutant subtype in EGFR-mutant patients

| Study ID             | Region | Number of patients |       | Histology | Stage   | Method (Ab)       | Definition of PD-L1 <sup>+</sup> | Number of PD-L1 <sup>+</sup> patients |       |
|----------------------|--------|--------------------|-------|-----------|---------|-------------------|----------------------------------|---------------------------------------|-------|
|                      |        | Ex19del            | L858R |           |         |                   |                                  | Ex19del                               | L858R |
| Cho et al. (2018)    | Korea  | 145                | 121   | Mix       | I-IV    | IHC (clone 22C3)  | ≥ 1%                             | 76                                    | 47    |
| Song et al. (2019)   | China  | 74                 | 88    | ADC       | I-IV    | IHC (clone SP263) | ≥ 25%                            | 16                                    | 9     |
| Takada et al. (2018) | Japan  | 98                 | 116   | ADC       | I-V     | IHC (clone SP142) | ≥ 5%                             | 20                                    | 20    |
| Tang et al. (2015)   | China  | 40                 | 47    | Mix       | IIIB-IV | IHC (clone E1L3N) | ≥ 5%                             | 26                                    | 35    |
| Yasuto et al. (2018) | Japan  | 40                 | 30    | ADC       | III-IV  | IHC (clone 22C3)  | ≥ 1%                             | 20                                    | 10    |

**Table S4** Demographic characteristics and their correlations with PD-L1 expression and CD8<sup>+</sup> TILs among molecular subgroups of NSCLC

| Characteristics                      | Whole population | Wild type  | EGFR mutation | KRAS mutation | ALK/EML4 fusion | <i>P</i> |
|--------------------------------------|------------------|------------|---------------|---------------|-----------------|----------|
| Case no.                             | 629              | 177        | 313           | 112           | 27              |          |
| Gender, n (%)                        |                  |            |               |               |                 | <0.001   |
| Male                                 | 313 (49.8)       | 111 (62.7) | 113 (36.1)    | 78 (69.6)     | 11 (40.7)       |          |
| Female                               | 316 (50.2)       | 66 (37.3)  | 200 (63.9)    | 34 (30.4)     | 16 (59.3)       |          |
| Age, n (%)                           |                  |            |               |               |                 | 0.105    |
| <60                                  | 337 (53.6)       | 87 (49.2)  | 171 (54.6)    | 59 (52.7)     | 20 (74.1)       |          |
| ≥ 60                                 | 292 (46.4)       | 90 (50.8)  | 142 (45.7)    | 53 (47.3)     | 7 (25.9)        |          |
| Smoking status, n (%)                |                  |            |               |               |                 | <0.001   |
| Never                                | 367 (58.3)       | 77 (43.5)  | 237 (36.1)    | 32 (28.6)     | 21 (77.8)       |          |
| Ever                                 | 262 (41.7)       | 100 (56.5) | 76 (63.9)     | 80 (71.4)     | 6 (22.2)        |          |
| Histology, n (%)                     |                  |            |               |               |                 | <0.001   |
| Adeno                                | 535 (85.1)       | 120 (67.8) | 294 (93.9)    | 95 (84.8)     | 26 (96.3)       |          |
| Others                               | 94 (14.9)        | 57 (32.2)  | 19 (6.1)      | 17 (15.2)     | 1 (3.7)         |          |
| PD-L1 TPS, n (%)                     |                  |            |               |               |                 | <0.001   |
| <1%                                  | 274 (43.6)       | 71 (40.1)  | 149 (47.6)    | 37 (33.0)     | 16 (59.3)       |          |
| 1–49%                                | 261 (41.5)       | 74 (41.8)  | 139 (44.4)    | 39 (34.8)     | 10 (37.0)       |          |
| ≥ 50%                                | 94 (14.9)        | 32 (18.1)  | 25 (8.0)      | 36 (32.2)     | 1 (3.7)         |          |
| CD8 <sup>+</sup> TIL, n (%)          |                  |            |               |               |                 | <0.001   |
| <1%                                  | 242 (38.5)       | 61 (34.5)  | 145 (46.3)    | 20 (17.8)     | 19 (70.3)       |          |
| 1–9%                                 | 303 (48.2)       | 86 (48.6)  | 144 (46.0)    | 63 (56.3)     | 7 (26.0)        |          |
| ≥ 10%                                | 84 (13.3)        | 30 (16.9)  | 24 (7.7)      | 29 (25.9)     | 1 (3.7)         |          |
| TIME, n (%)                          |                  |            |               |               |                 | <0.001   |
| PD-L1 <sup>-</sup> /TIL <sup>-</sup> | 147 (23.3)       | 37 (20.9)  | 88 (28.1)     | 10 (8.9)      | 12 (44.4)       |          |
| PD-L1 <sup>-</sup> /TIL <sup>+</sup> | 109 (17.3)       | 34 (19.2)  | 61 (19.5)     | 10 (8.9)      | 4 (14.8)        |          |
| PD-L1 <sup>+</sup> /TIL <sup>-</sup> | 115 (18.3)       | 24 (13.6)  | 57 (18.2)     | 27 (24.1)     | 7 (26.0)        |          |
| PD-L1 <sup>+</sup> /TIL <sup>+</sup> | 258 (41.1)       | 82 (46.3)  | 107 (34.2)    | 65 (58.1)     | 4 (14.8)        |          |

**Table S5** Demographic characteristics and their correlations with PD-L1 expression and CD8<sup>+</sup> TILs in a cohort of EGFR-mutant NSCLC patients

| Characteristics                      | EGFR mutation | Ex19del   | L858R      | Others    | <i>P</i> |
|--------------------------------------|---------------|-----------|------------|-----------|----------|
| Case no.                             | 313           | 97        | 135        | 81        |          |
| Gender, n (%)                        |               |           |            |           | 0.425    |
| Male                                 | 113 (36.1)    | 38 (39.2) | 41 (30.4)  | 34 (42.0) |          |
| Female                               | 200 (63.9)    | 59 (60.8) | 94 (69.6)  | 47 (58.0) |          |
| Age, n (%)                           |               |           |            |           | 0.731    |
| <60                                  | 171 (54.6)    | 59 (60.8) | 65 (48.1)  | 47 (58.0) |          |
| ≥ 60                                 | 142 (45.7)    | 38 (39.2) | 70 (51.9)  | 34 (42.0) |          |
| Smoking status, n (%)                |               |           |            |           | 0.060    |
| Never                                | 237 (36.1)    | 71 (73.2) | 108 (80.0) | 58 (71.6) |          |
| Ever                                 | 76 (63.9)     | 26 (26.8) | 27 (20.0)  | 23 (28.4) |          |
| Histology, n (%)                     |               |           |            |           | 0.080    |
| Adeno                                | 294 (93.9)    | 94 (96.9) | 130 (96.3) | 70 (86.4) |          |
| Others                               | 19 (6.1)      | 3 (3.1)   | 5 (3.7)    | 11 (13.6) |          |
| PD-L1 TPS, n (%)                     |               |           |            |           | 0.025    |
| <1%                                  | 149 (47.6)    | 54 (55.7) | 50 (37.0)  | 45 (55.5) |          |
| 1–49%                                | 139 (44.4)    | 38 (39.2) | 71 (52.6)  | 30 (37.1) |          |
| ≥ 50%                                | 25 (8.0)      | 5 (5.1)   | 14 (10.4)  | 6 (7.4)   |          |
| CD8 <sup>+</sup> TIL, n (%)          |               |           |            |           | 0.250    |
| <1%                                  | 145 (46.3)    | 45 (46.4) | 57 (42.2)  | 43 (53.1) |          |
| 1–9%                                 | 144 (46.0)    | 43 (44.3) | 65 (48.2)  | 36 (44.4) |          |
| ≥ 10%                                | 24 (7.7)      | 9 (9.3)   | 13 (9.6)   | 2 (2.5)   |          |
| TIME, n (%)                          |               |           |            |           | 0.044    |
| PD-L1 <sup>-</sup> /TIL <sup>-</sup> | 88 (28.1)     | 29 (29.9) | 29 (21.5)  | 30 (37.0) |          |
| PD-L1 <sup>-</sup> /TIL <sup>+</sup> | 61 (19.5)     | 25 (24.7) | 21 (15.6)  | 15 (18.5) |          |
| PD-L1 <sup>+</sup> /TIL <sup>-</sup> | 57 (18.2)     | 16 (16.5) | 28 (20.7)  | 13 (16.1) |          |
| PD-L1 <sup>+</sup> /TIL <sup>+</sup> | 107 (34.2)    | 27 (28.9) | 57 (42.2)  | 23 (28.4) |          |
